# Supplementary material for: Optimizing graphene oxide membranes for effective removal of dyes by modulating the reduction degree and doped nitrogen
Source: Royal Society of Chemistry journal article supplement (doi:10.1039/d2ra00725h), 2022-01-01
Supplement: d2ra00725h1.pdf [file d2ra00725h1.pdf]

## Supporting Information

### Optimizing Graphene Oxide Membrane for Effective Removing Dyes by Modulating the Reduction Degree and Doped Nitrogen

Jin Bai<sup>a,b</sup>, Jianren Huang<sup>b,c</sup>, Qirui Wu<sup>b,c</sup> and Lunhui Guan<sup>\*b</sup>

- a. College of Chemistry, Fuzhou University, Xueyuan Road No. 2, Fuzhou 350108, China
- b. CAS Key Laboratory of Design and Assembly of Functional Nanostructures, and Fujian Key Laboratory of Nanomaterials, Fujian Institute of Research on the Structure of Matter, Chinese Academy of Sciences, Fuzhou, Fujian 350002, China
- c. College of Mechanical Engineering and Automation, Fuzhou University, Xueyuan Road No. 2, Fuzhou 350108, China.

\* Corresponding Author: [guanlh@fjirsm.ac.cn](mailto:guanlh@fjirsm.ac.cn)

### Material Characterizations.

The surface and cross-section of NGO-x membranes were evaluated by scanning electron microscopy (HITACHI SU-8010 Field Emission Scanning Electron Microscope). The interlayer spacing of NGO-x membranes was obtained from X-ray diffraction (XRD, Rigaku MiniFlex) using Cu K $\alpha$  radiation. Raman spectra (Horiba Jobin Yvon LabRAM ARAMIS) with 532 nm laser was used to analyze the structure of GO and NGO-x membranes. Fourier transform infrared spectroscopy (FT-IR, VERTEX 70, Bruker, Germany). X-ray photoelectron spectroscopy (ESCALAB 250Xi, ThermoFisher) were employed to characterize the chemical composition and structure of GO and NGO-x membranes. The contact angle of the membranes were measured to evaluate their hydrophilicity by a contact angle tester (JC20000D1, Shanghai Zhongchen Co., Ltd., China). Test the concentration of the dye solution were determined by using UV-vis spectrophotometer (UV-vis, UV756CRT, You Ke Co., Ltd., China).

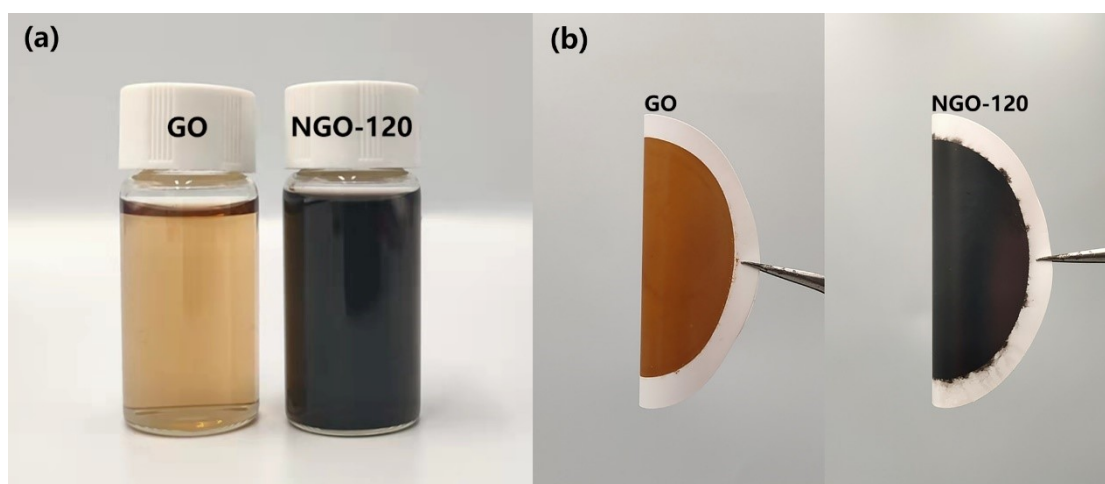

**Fig. S1.** Digital Photograph of GO and NGO (a) dispersions and (b) membranes.

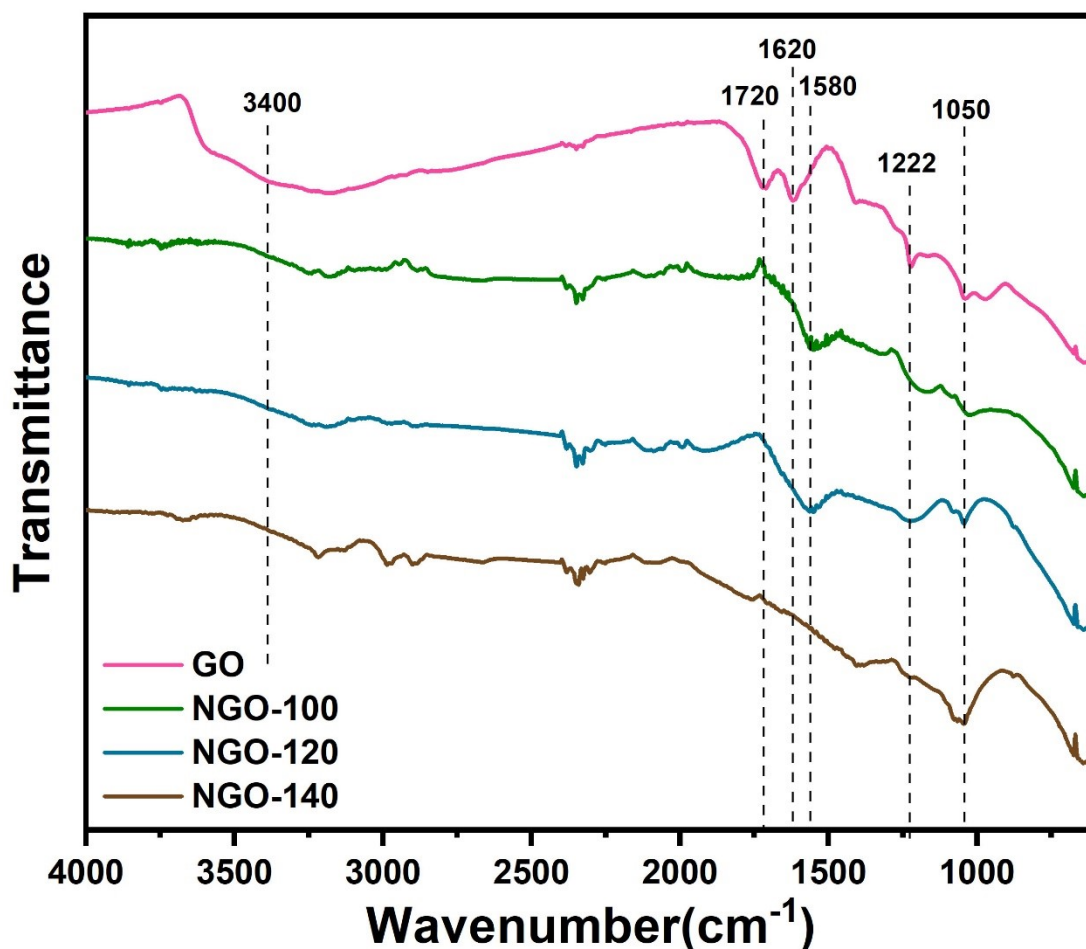

**Fig. S2.** FT-IR spectra of GO and NOG-x membranes.

The characteristic bands of the infrared spectrum of GO are located at  $3204\text{ cm}^{-1}$  (-OH stretched),  $1720\text{ cm}^{-1}$  (C=O stretched from the carbonyl group),  $1620\text{ cm}^{-1}$  (C=C stretched),  $1220\text{ cm}^{-1}$  (C-OH stretched) -O vibration) and  $1050\text{ cm}^{-1}$  (C-O vibration of epoxy group).<sup>1</sup> With the increase of the hydrothermal temperature, the bands of -OH, C=O and C-OH gradually weakened or even disappeared, indicating that some oxygen-containing functional groups in GO decreased. At the same time, the appearance of a new peak at  $\sim 1050\text{ cm}^{-1}$  in the NGO-x sample indicates the formation of a C-N bond.<sup>2</sup> The peak at  $\sim 1580\text{ cm}^{-1}$  is attributed to the N-H bending vibration in the NGO-x samples.<sup>3</sup> The formation of the N-C bond and the remaining C-O group are confirmed by the appearance of a new peak at  $\sim 1100\text{ cm}^{-1}$ .<sup>4</sup> All these results confirm the partial reduction and nitrogen doping on graphene.

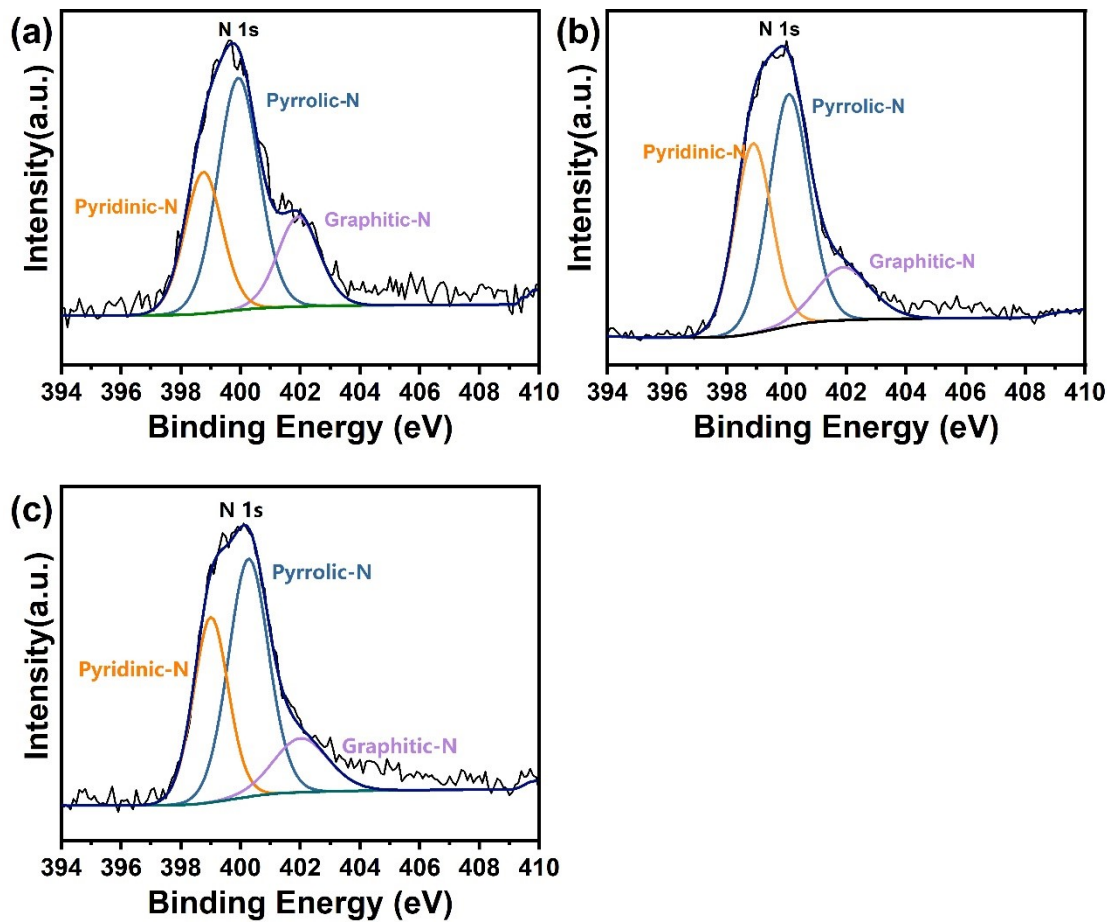

Fig. S3. XPS spectra. N1s of (a) NGO-100, (b) NGO-120 and (c) NGO-140.

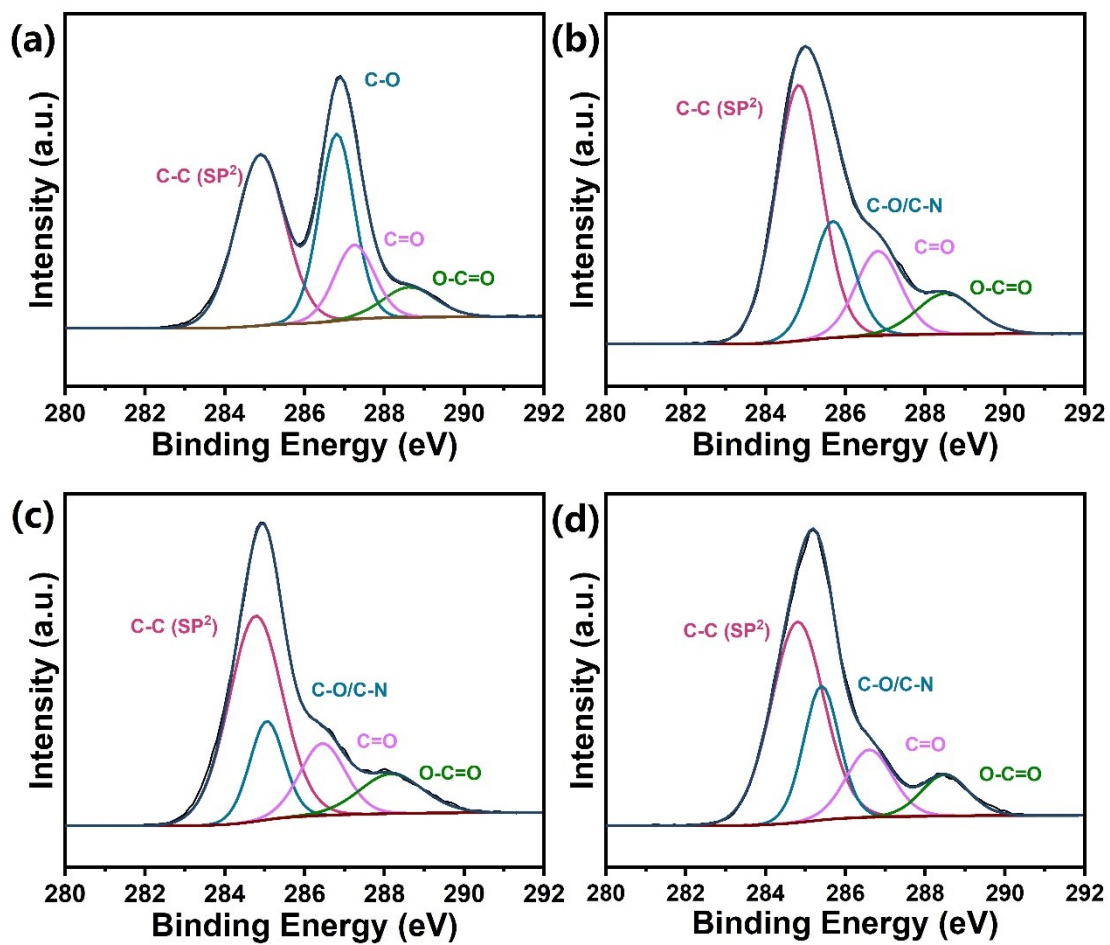

Fig. S4. XPS spectra. C1s of (a) GO powder, (b) NGO-100, (c) NGO-120 and (d) NGO-140.

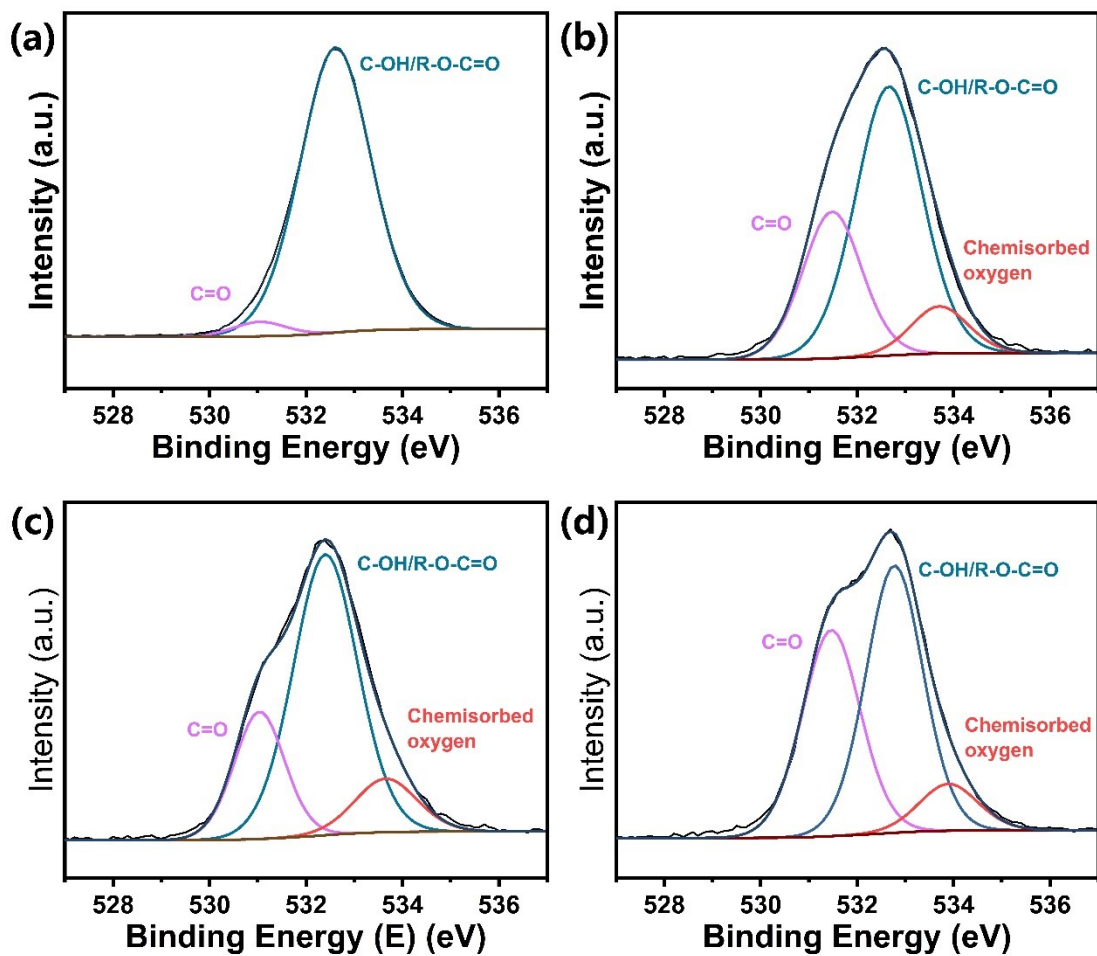

**Fig. S5.** XPS spectra. O1s of (a) GO powder, (b) NGO-100, f (c) NGO-120 and (d) NGO-140.

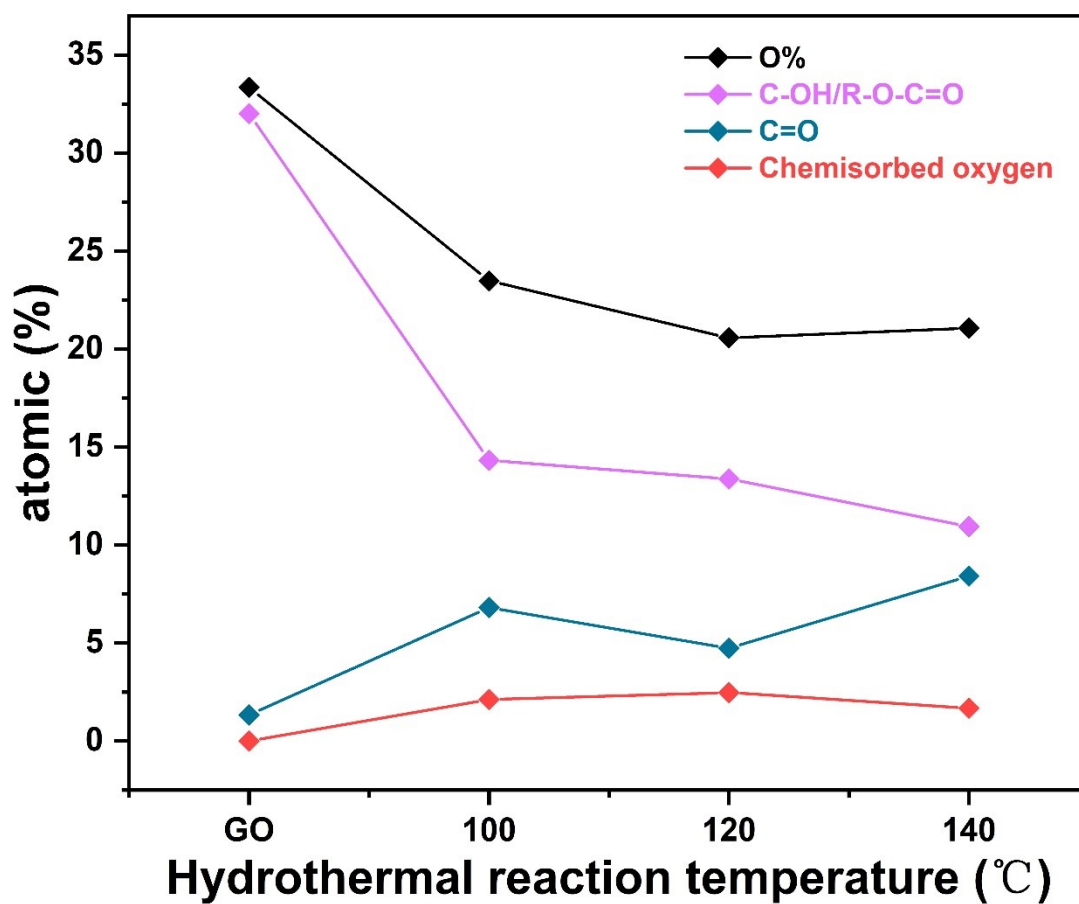

**Fig. S6.** The relationship between functional oxygen-containing groups and hydrothermal temperature.

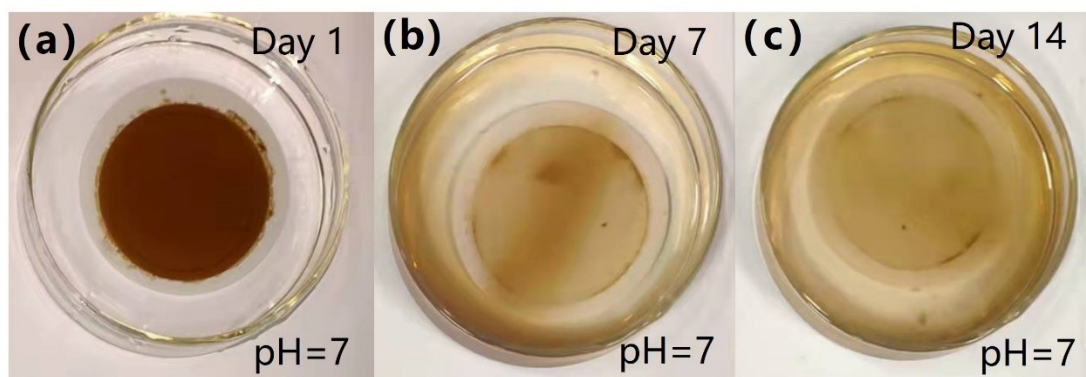

**Fig. S7.** Physical photos of 14-day stability of GO in water

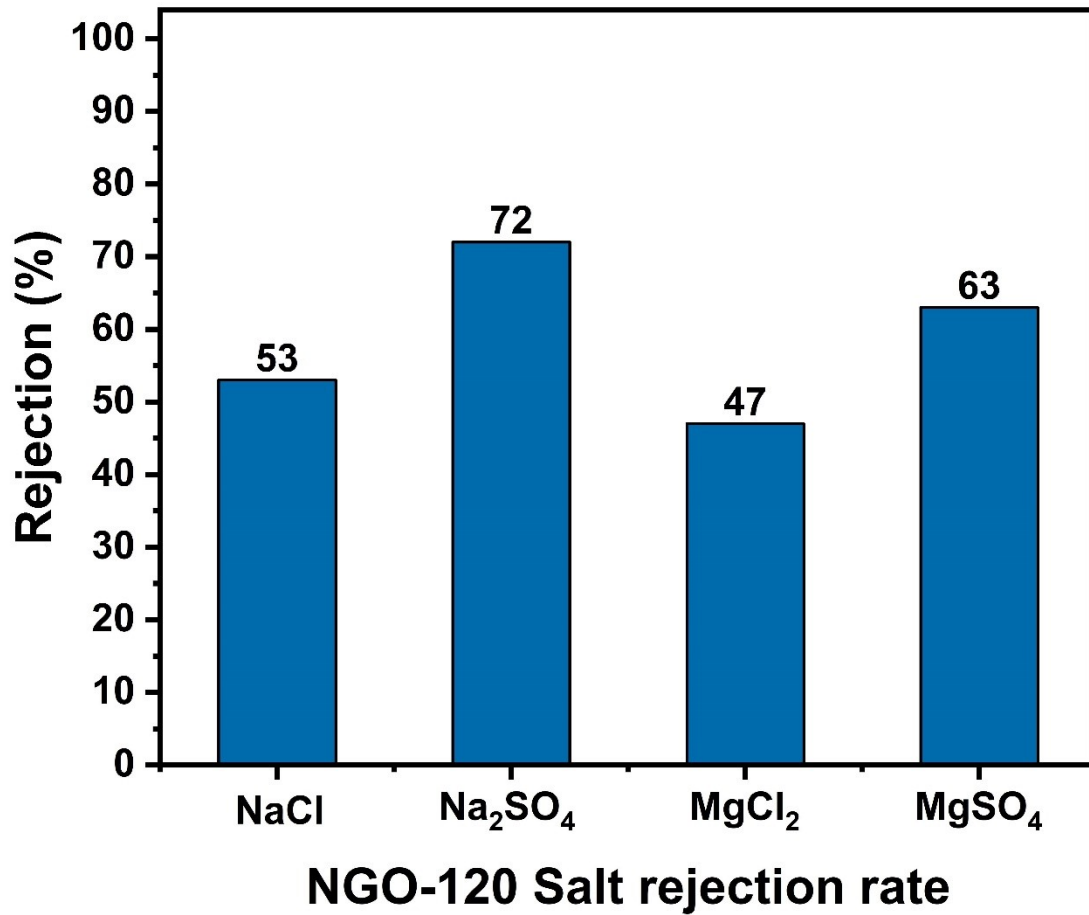

Fig. S8. NGO-120 Salt rejection rate (Feed salt concentration: 2000 ppm. Feed pressure: 1 bar.).



**Table S1.** Comparison of the nanofiltration performance for graphene-based membranes.

| Membrane                      | Water permeance<br>( $L \cdot m^{-2} \cdot h^{-1} \text{ bar}^{-1}$ ) | MWCO                  | Rejection<br>(%)           | Pressure<br>(bar) | Ref       |
|-------------------------------|-----------------------------------------------------------------------|-----------------------|----------------------------|-------------------|-----------|
| NGO-100                       | 4.89                                                                  | 320 (MnB)<br>800 (MB) | MnB (>97%),<br>MB (99.8%)  | 1                 | This work |
| NGO-120                       | 9.76                                                                  | 320 (MnB)<br>800 (MB) | MnB (99.6%),<br>MB (99.8%) | 1                 | This work |
| NGO-140                       | 5.86                                                                  | 320 (MnB)<br>800 (MB) | MnB (>95%),<br>MB (>97%)   | 1                 | This work |
| (PDDA/GO) <sub>4,0</sub> /PAN | 6.42                                                                  | 800 (MB)              | MB (99%)                   | 5                 | 5         |
| MWCNTs/rGO/PVDF               | 11.3                                                                  | 327 (MO)              | MO (>96%)                  | 5                 | 6         |
| rGO                           | 16                                                                    | 800 (MB)              | MB (99%)                   | 1                 | 7         |
| GO@ PAN                       | 8.2                                                                   | 697 (CR)              | CR (99%)                   | 5                 | 8         |
| GO/NG                         | 6.13                                                                  | 800 (MB)              | MB (>98%)                  | 1                 | 9         |
| GO/MB                         | 3.83                                                                  | 327 (MO)              | MO (>96%)                  | 1                 | 10        |
| PDA / RGO / MOFs              | 5                                                                     | 697 (CR)              | CR (>89%)                  | 1                 | 11        |
| uGNMs                         | 21.81                                                                 | 800 (MB)              | MB (99.2%)                 | 1                 | 12        |
| GO/Ca/CR                      | 17.1                                                                  | 800 (MB)              | MB (99.5%)                 | 5                 | 13        |

## References

- 1 H. H. Huang, R. K. Joshi, K. K. H. De Silva, R. Badam and M. Yoshimura, *Journal of Membrane Science*, 2019, **572**, 12-19.
- 2 R. W. Shu, Z. L. Wan, J. B. Zhang, Y. Wu, Y. Liu, J. J. Shi and M. D. Zheng, *Acs Applied Materials & Interfaces*, 2020, **12**, 4689-4698.
- 3 M. Song, J. Zhao, Y. Meng, L. Riekehr, P. X. Hou, H. Grennberg and Z. B. Zhang, *ChemNanoMat*, 2019, **5**, 1144-1151.
- 4 Z. Y. Lin, G. Waller, Y. Liu, M. L. Liu and C. P. Wong, *Advanced Energy Materials*, 2012, **2**, 884-888.
- 5 L. Wang, N. X. Wang, J. Li, J. W. Li, W. W. Bian and S. L. Ji, *Separation and Purification Technology*, 2016, **160**, 123-131.
- 6 Y. Han, Y. Q. Jiang and C. Gao, *Acs Applied Materials & Interfaces*, 2015, **7**, 8147-8155.
- 7 X. T. Fan, C. B. Cai, J. Gao, X. L. Han and J. D. Li, *Separation and Purification Technology*, 2020, **241**, 8.
- 8 J. Q. Wang, P. Zhang, B. Liang, Y. X. Liu, T. Xu, L. F. Wang, B. Cao and K. Pan, *Acs Applied Materials & Interfaces*, 2016, **8**, 6211-6218.
- 9 R. T. Hou, Y. He, H. Yu, J. Ma, Y. X. Gao, Y. Bai and J. Y. Chen, *Chemical Physics Letters*, 2021, **775**, 8.
- 10 J. K. Hou, Y. B. Chen, W. X. Shi, C. L. Bao and X. Y. Hu, *Applied Surface Science*, 2020, **505**, 12.
- 11 Y. C. Liu, M. Zhu, M. Y. Chen, L. L. Ma, B. Yang, L. L. Li and W. W. Tu, *Chemical Engineering Journal*, 2019, **359**, 47-57.
- 12 Y. Han, Z. Xu and C. Gao, *Advanced Functional Materials*, 2013, **23**, 3693-3700.
- 13 S. Zhao, H. T. Zhu, H. Wang, P. Rassu, Z. Wang, P. Song and D. W. Rao, *Journal of Hazardous Materials*, 2019, **366**, 659-668.
